# Supplementary material for: Whole-Body [18F]FDG PET/CT Can Alter Diagnosis in Patients with Suspected Rheumatic Disease
Source: MDPI journal article supplement (doi:10.3390/diagnostics11112073), 2021-11-09
Supplement: s1 [file s1]

Supplementary

## Whole-Body [ $^{18}\text{F}$ ]FDG PET/CT Can Alter Diagnosis in Patients with Suspected Rheumatic Disease

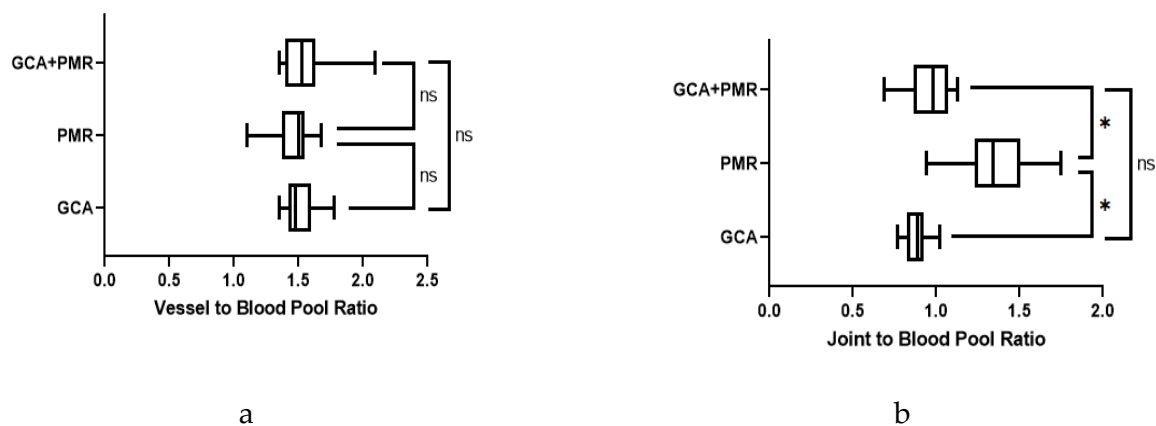

**Figure S1.** (a) The Vessel to Blood Pool ratio showed no significant differences between patients with final diagnosis of giant cell arteritis (GCA) + polymyalgia rheumatica (PMR) vs. PMR or GCA alone. (b) The Joint to Blood Pool ratio, however, was significantly increased in patients with PMR relative to GCA alone or GCA + PMR. Blood pool uptake was assessed by placing volumes of interests on jugular vein. As such, similar results were obtained when healthy liver was used as reference tissue (Figure 3). \* $p < 0.001$ ; ns = not significant.
